# Supplementary material
Source: Springer Nature journal article supplement (https://www.springermedizin.de/resource/supplementary/12913_2012_2643_MOESM6_ESM.pdf/9531042)
Supplement: MOESM6 [file 9531042]

## Additional File 6: Original G-AP Framework<sup>1</sup>

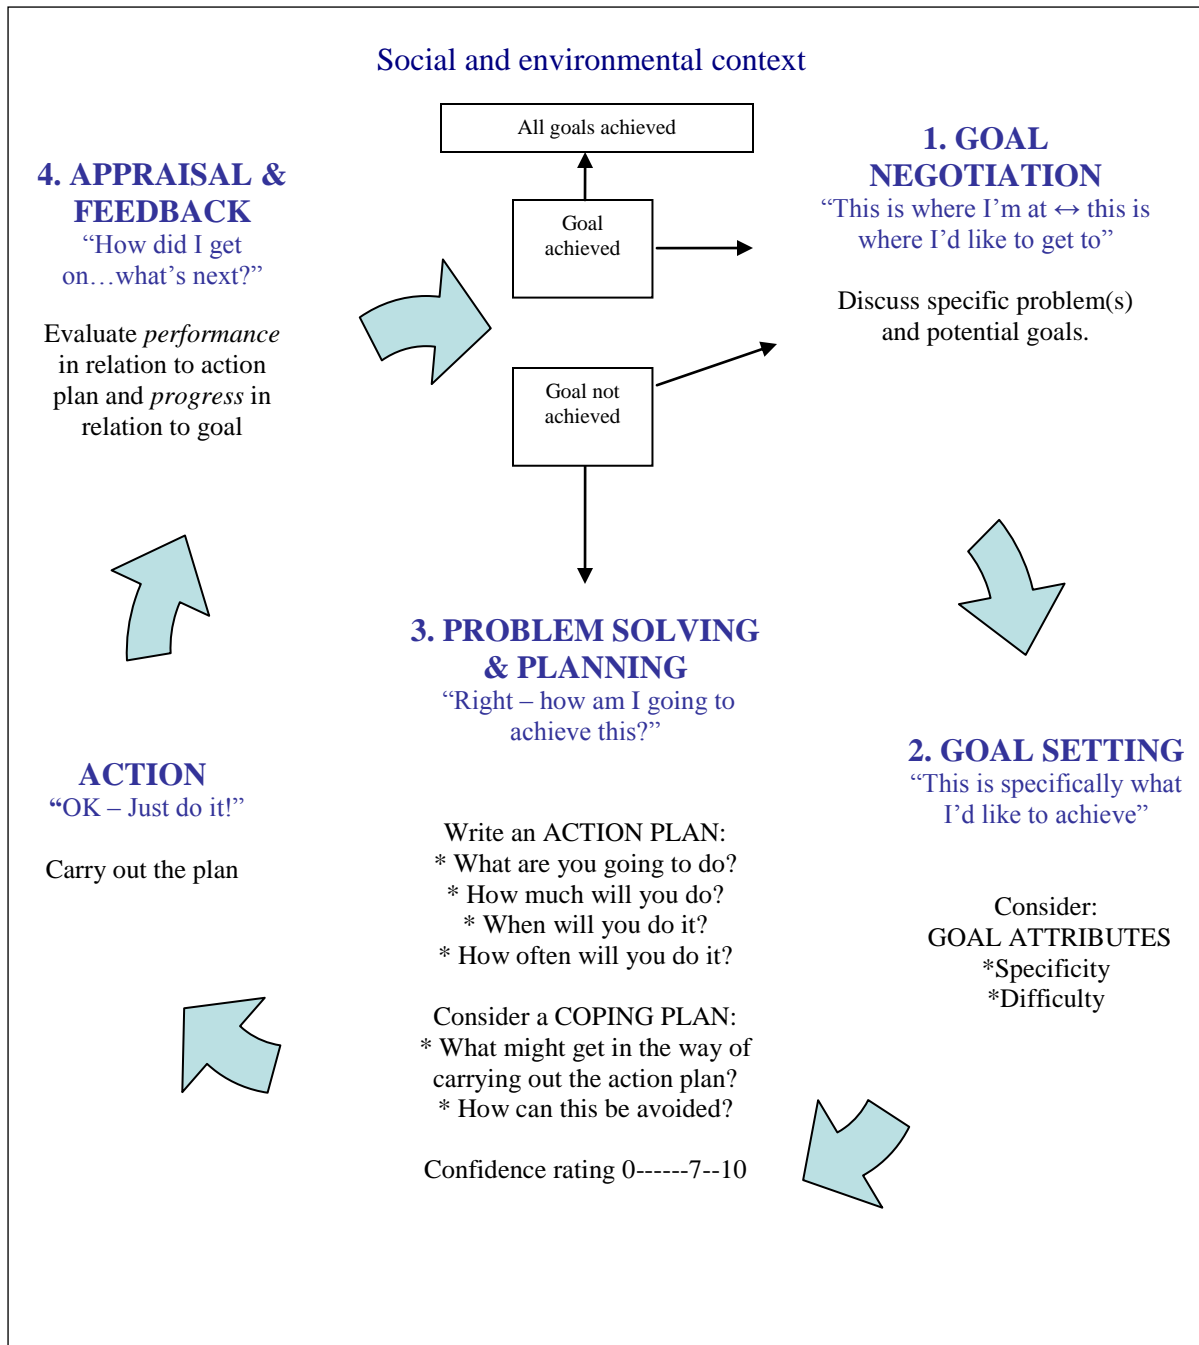

1. Originally published in Clinical Rehabilitation: Scobbie, L., Wyke, S., Dixon, D. Goal setting and action planning in clinical rehabilitation: Development of a theoretically informed practice framework. Clinical Rehabilitation 2011; 25(5) 468–482. Copyright © 2011, SAGE Publications. All rights reserved. <http://cre.sagepub.com/content/25/5/468.abstract>
